# Supplementary material for: New Findings on the Crystal Polymorphism of Imepitoin
Source: MDPI journal article supplement (doi:10.3390/molecules29081724), 2024-04-11
Supplement: s1 [file s1]

## Supplementary Material for:

# New findings on crystal polymorphism of imepitoin

Giovanna Bruni <sup>1,\*</sup>, Doretta Capsoni <sup>1</sup>, Anna Pellegrini <sup>1</sup>, Angela Altomare <sup>2</sup>, Mauro Coduri <sup>1</sup>, Chiara Ferrara <sup>3</sup>, Pietro Galinetto <sup>4</sup>, and Renato Molteni <sup>5</sup>

<sup>1</sup> Department of Chemistry, Physical Chemistry Section & C.S.G.I. (Consorzio Interuniversitario per lo Sviluppo dei Sistemi a Grande Interfase), University of Pavia, 27100 Pavia, Italy; giovanna.bruni@unipv.it (G.B.); doretta.capsoni@unipv.it (D.C.); anna.pellegrini01@universitadipavia.it (A.P.); mauro.coduri@unipv.it (M.C.)

<sup>2</sup> Institute of Crystallography – CNR, Via Amendola 122/o, Bari, I-70126, Italy; angela.altomare@ic.cnr.it (A.A.)

<sup>3</sup> Department of Materials Science, University of Milano-Bicocca, via Cozzi 55, 20125 Milano, Italy; chiara.ferrara@unimib.it (C.F.)

<sup>4</sup> Department of Physics, via Bassi 6, 27100 Pavia, Italy; pietro.galinetto@unipv.it (P.G.)

<sup>5</sup> A.M.S.A. Anonima Materie Sintetiche Affini S.p.A., Viale Giuseppe Di Vittorio 6, 2100 Como, Italy; r.molteni@amsacomo.it (R.M.)

\* Correspondence: giovanna.bruni@unipv.it

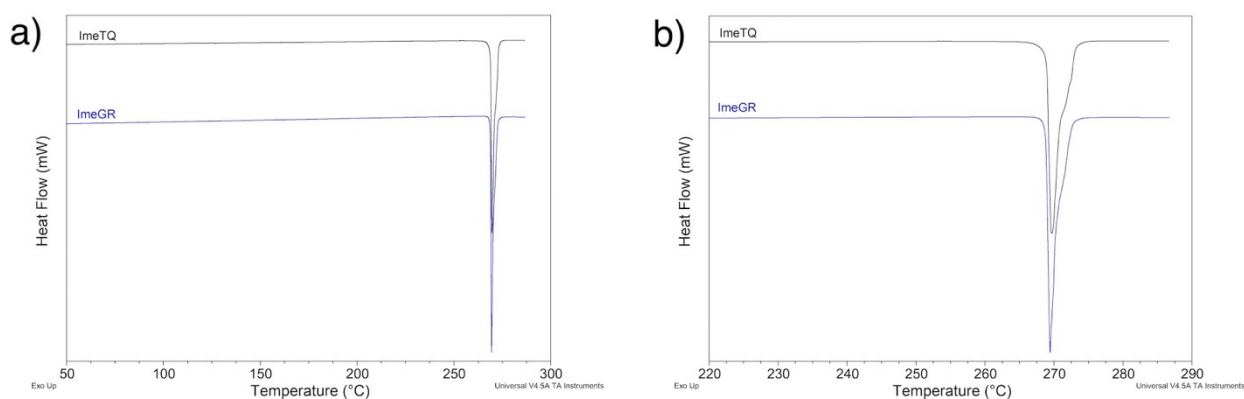

Figure S1- DSC curves of *ImeTQ* and *ImeGR* at 10 K min<sup>-1</sup>: a) temperature scale from 50 °C to 300 °C; b) the same DSC curves with the temperature scale expanded (from 220 °C to 290 °C).

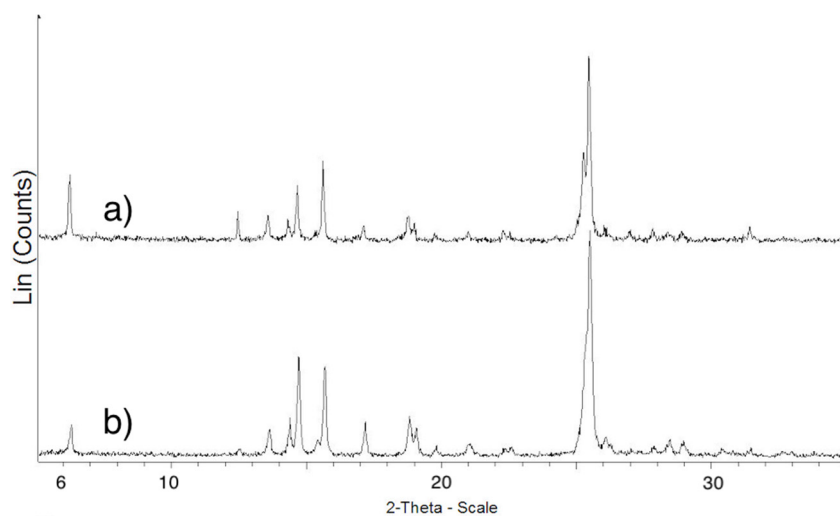

Figure S2 – XRPD patterns of *ImeTQ* (a) and *ImeGR* (b).

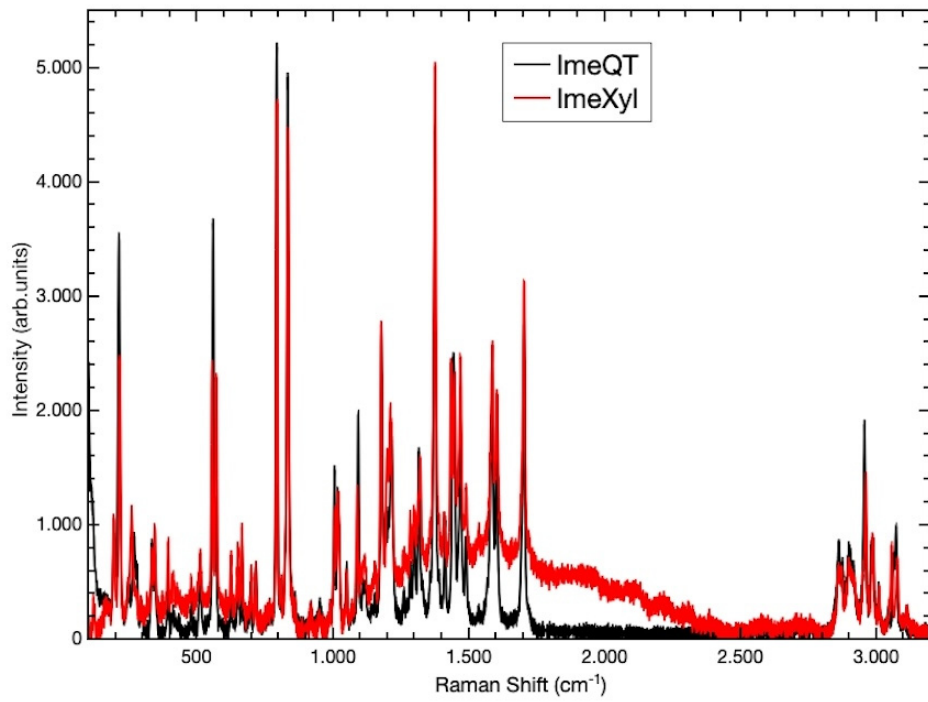

(a)

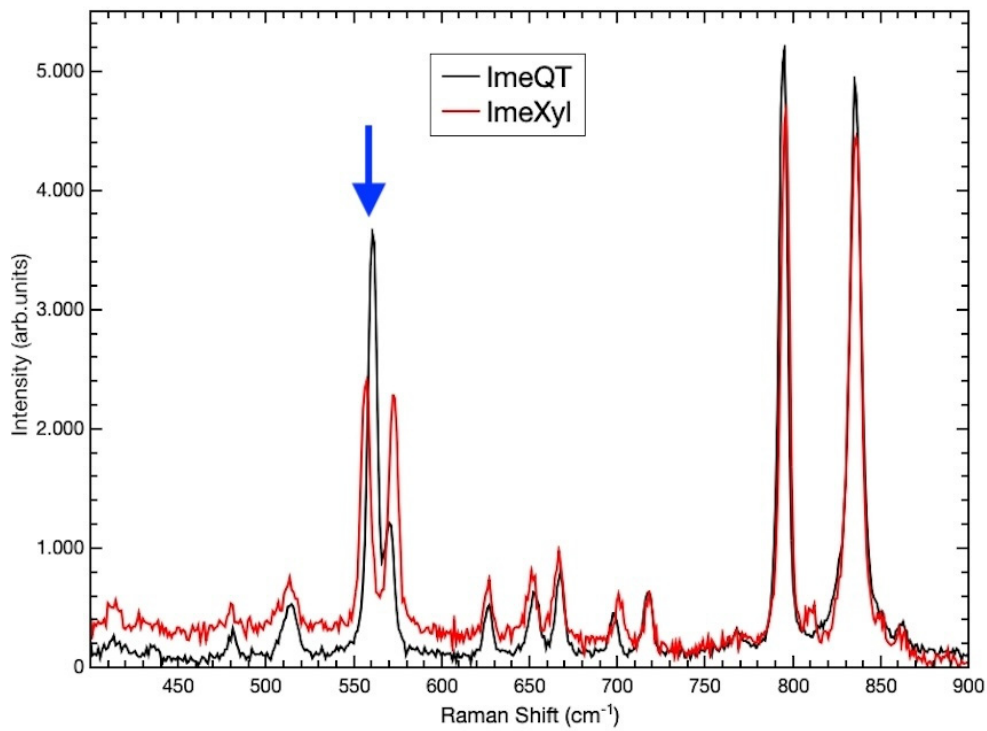

(b)

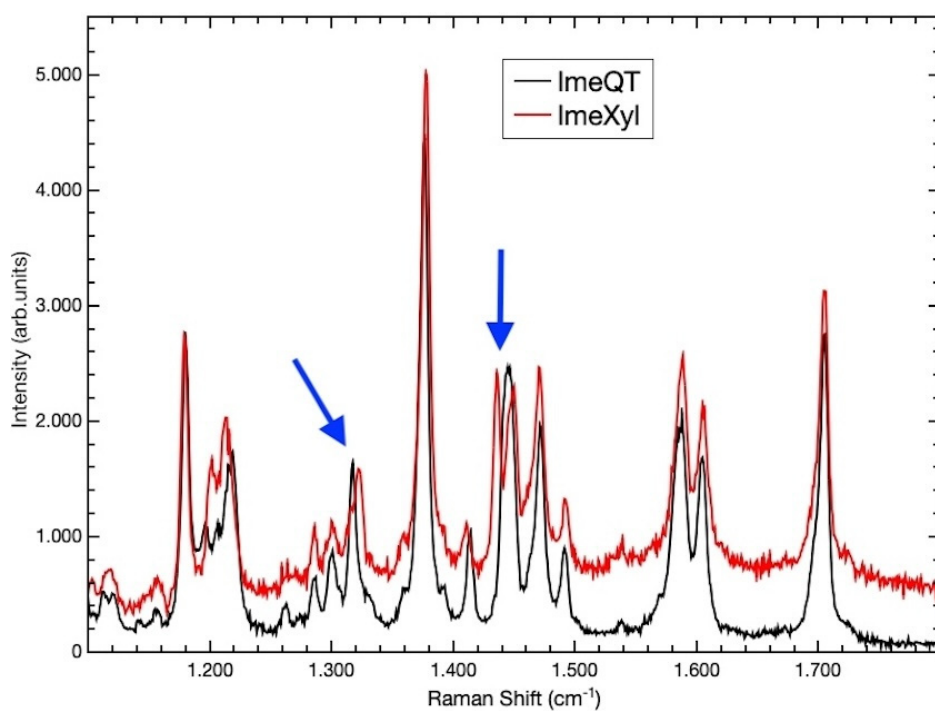

(c)

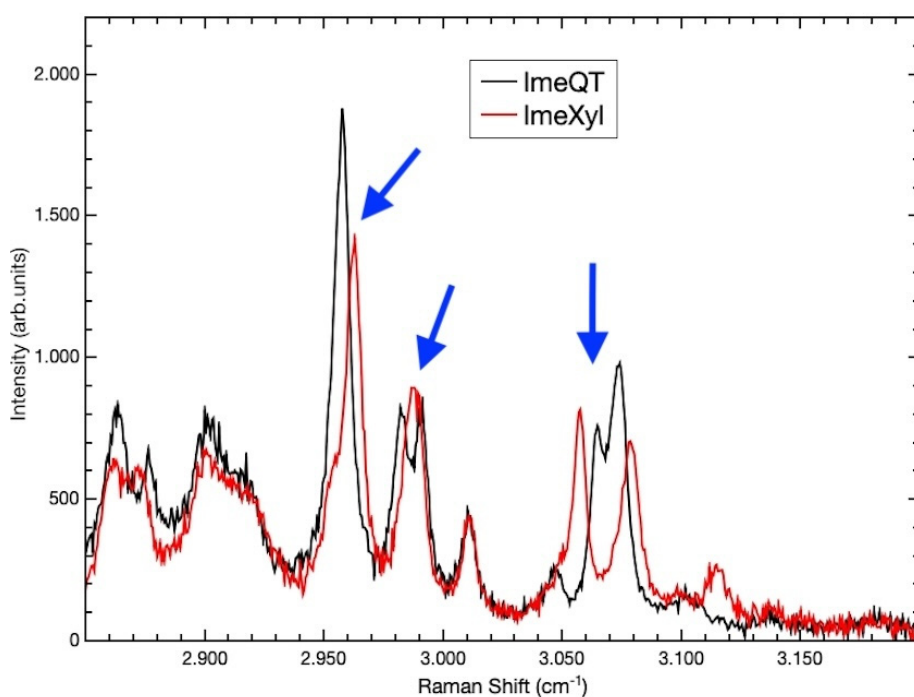

(d)

Figure S3 - a) The whole Raman spectra for *ImeTQ* (black line) and *ImeXyl* (red line). The enlarged spectra in the energy regions; b) between 400 and 900  $\text{cm}^{-1}$ , c) 1100-1800  $\text{cm}^{-1}$  and d) 2850-3100  $\text{cm}^{-1}$ . The arrows indicate the main observed spectral changes.

Polymorph I

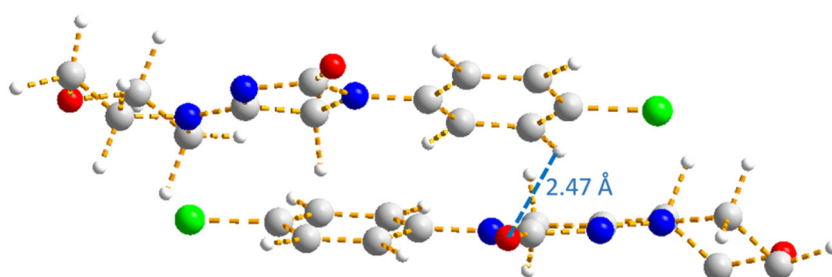

Polymorph II

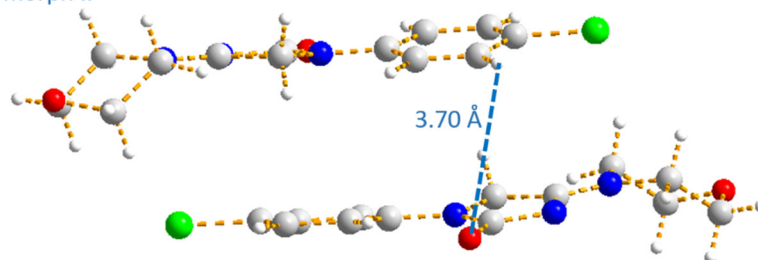

Figure S4 - H1...O1 distances in Polymorph I and Polymorph II.

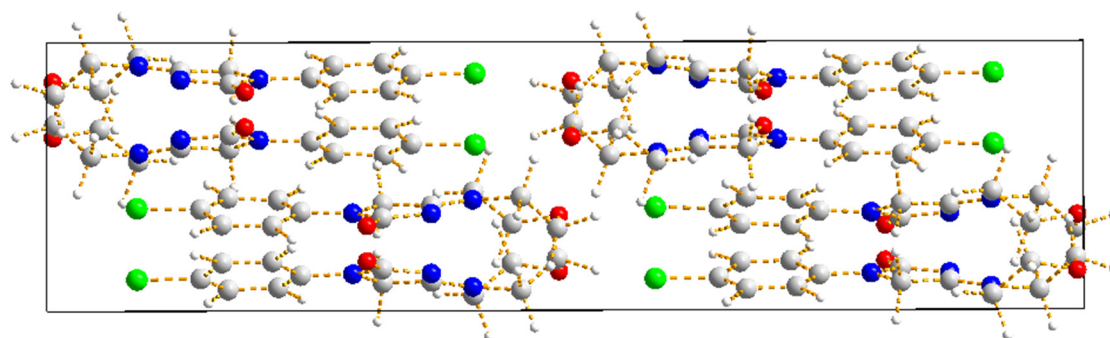

c  
b  
a)  
↑  
→

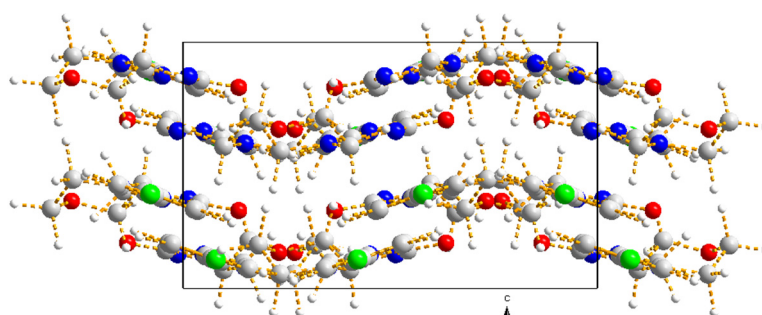

c  
a  
b)  
↑  
→

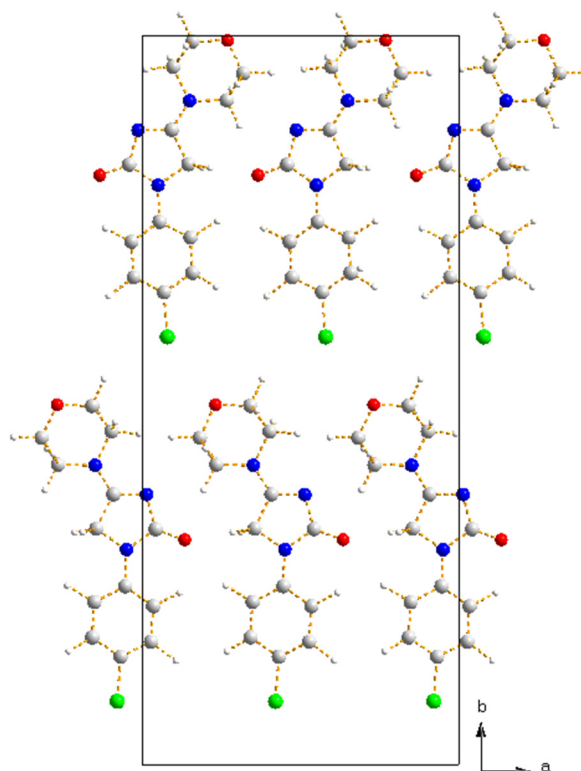

b  
a  
c)  
↑  
→

Figure S5 - Imepitoin polymorph I crystal structure viewed down a) *a*-, b) *b*- and c) *c*-axes.

Table S1 - X-ray Crystallographic Data Collection and Structure Refinement for imepitoin polymorph II.

| <b>Crystal data</b>              | <b>Imepitoin Polymorph II</b>                                                                   |
|----------------------------------|-------------------------------------------------------------------------------------------------|
| Chemical formula                 | C <sub>13</sub> H <sub>14</sub> CIN <sub>3</sub> O <sub>2</sub>                                 |
| Formula weight (g/mol)           | 279.72                                                                                          |
| Crystal system                   | Monoclinic                                                                                      |
| Space group                      | <i>P</i> 2 <sub>1</sub> / <i>c</i>                                                              |
| Temperature (K)                  | 298                                                                                             |
| Cell parameters (Å, °)           | <i>a</i> = 14.8687(6)<br><i>b</i> = 7.2434(2)<br><i>c</i> = 12.5592(4)<br>$\beta$ = 107.5586(8) |
| Volume (Å <sup>3</sup> )         | 1289.61(8)                                                                                      |
| <i>Z</i>                         | 4                                                                                               |
| <i>Z'</i>                        | 1                                                                                               |
| Radiation type                   | Synchrotron radiation,<br>$\lambda$ = 0.35418 Å                                                 |
| <b>Data collection</b>           |                                                                                                 |
| Beamline                         | ID22@ESRF                                                                                       |
| Specimen mounting                | borosilicate capillary                                                                          |
| Data collection mode             | transmission                                                                                    |
| 2 $\theta$ (°)                   | 2 $\theta_{\min}$ = 0.00<br>2 $\theta_{\max}$ = 36.00                                           |
| <b>Structure solution</b>        |                                                                                                 |
| Methods                          | Direct methods, simulated annealing (SA)                                                        |
| Parameters (SA)                  | 6+2 DOF, 19 non-hydrogen atoms                                                                  |
| Cost function (SA)               | $R_{wp}$ = 17.251                                                                               |
| Building the starting model (SA) | ACD/ChemSketch [1]                                                                              |
| Geometry optimization (SA)       | MOPAC2016 [2]                                                                                   |
| <b>Refinement</b>                |                                                                                                 |
| $R_p$                            | 5.447                                                                                           |
| $R_{wp}$                         | 8.104                                                                                           |
| $R_{exp}$                        | 6.246                                                                                           |
| $R_{Bragg}$                      | 6.576                                                                                           |

|                                   |                               |
|-----------------------------------|-------------------------------|
| $\chi^2$                          | 1.277                         |
| No. of data points                | 9750                          |
| No. of reflections                | 1169                          |
| Profile function                  | Pearson VII                   |
| <i>Refinement parameters</i>      |                               |
| Lattice                           | 4                             |
| Positional                        | 57                            |
| ADP                               | 3                             |
| Profile                           | 10                            |
| Background                        | 19                            |
| Zero error                        | 1                             |
| Restraints                        | 50                            |
| H-atom treatment                  | H-atom parameters constrained |
| <b>Programs</b>                   |                               |
| Indexing                          | TOPAS4.2 [3]                  |
| Space group determination         | EXPO [4]                      |
| Structure solution and refinement | EXPO [4]                      |
| Model building                    | Diamond (version3.0)          |

Table S2 – Comparison of H···A and C···A distances (Å) for the two polymorphic forms. The polymorph I data are taken from table 1 reported by Kaduk et al [5].

| <b>H-Bond</b> | <b>Polymorph II</b> |                  | <b>Polymorph I</b> |                  |
|---------------|---------------------|------------------|--------------------|------------------|
|               | <b>H···A (Å)</b>    | <b>C···A (Å)</b> | <b>H···A (Å)</b>   | <b>C···A (Å)</b> |
| C8-H4···O1    | 2.34                | 3.24             | 2.13               | 3.20             |
| C13-H14···O1  | 2.24*               | 2.87             | 2.18               | 2.90             |
| C1-H1···O1    | 3.70                | 3.74             | 2.47               | 3.23             |
| C12-H12···O1  | 2.78                | 3.71             | 2.66               | 3.69             |
| C10-H8···O2   | 2.70                | 3.49             | 2.57               | 2.48             |
| C11-H11···N3  | 2.41*               | 2.83*            | 2.38*              | 2.85*            |
| C9-H6···Cl1   | 3.25                | 4.24             | 3.06               | 4.00             |

[1] ACD/ChemSketch, Advanced Chemistry Development, Inc.: Toronto, ON, Canada, 2003.

[2] MOPAC2016, Version 18.305L, in: J. J. P. Stewart, Stewart Computational Chemistry, Colorado Springs, CO, USA. <http://OpenMOPAC.net/>.

[3] TOPAS4.2; Bruker: Karlsruhe, Germany, 2009.

[4] Altomare, A.; Cuocci, C.; Giacovazzo, C.; Moliterni, A.; Rizzi, R.; Corriero, N.; Falcicchio, A. EXPO2013: a kit of tools for phasing crystal structures from powder data. *J. Appl. Cryst.* **2013**, *46*, 1231–1235.

[5] Kaduk, J.A.; Gindhart, A.M.; Gates-Rector, S.; Blanton, T.N. Crystal structure of imepitoin, C<sub>13</sub>H<sub>14</sub>ClN<sub>3</sub>O<sub>2</sub>. *Powder Diffr.* **2022**, *37*, 206-2010.
